# Supplementary material for: Sulfuric acid-modified poly(vinylpyrrolidone) ((PVP–SO3H)HSO4): a new highly efficient, bio-degradable and reusable polymeric catalyst for the synthesis of acridinedione derivatives
Source: Royal Society of Chemistry journal article supplement (doi:10.1039/c4ra12219d), 2014-12-16
Supplement: c4ra12219d1.pdf [file c4ra12219d1.pdf]

Supporting Information

**Sulfuric acid-modified poly(vinylpyrrolidone) ((PVP-SO<sub>3</sub>H)HSO<sub>4</sub>): a new highly efficient, bio-degradable and reusable polymeric catalyst for the synthesis of acridinedione derivatives**

*Hamid Reza Safaei , Maryam Safaei and Mohsen Shekouhy*

**Table of Contents**

|                                         |        |
|-----------------------------------------|--------|
| <sup>1</sup> H NMR of Compound 7e.....  | page 2 |
| <sup>13</sup> C NMR of Compound 7e..... | page 2 |
| <sup>1</sup> H NMR of Compound 7g.....  | page 3 |
| <sup>13</sup> C NMR of Compound 7g..... | page 3 |
| <sup>1</sup> H NMR of Compound 7k.....  | page 4 |
| <sup>13</sup> C NMR of Compound 7k..... | page 4 |
| <sup>1</sup> H NMR of Compound 7m.....  | page 5 |
| <sup>1</sup> H NMR of Compound 7n.....  | page 5 |
| <sup>13</sup> C NMR of Compound 7n..... | page 6 |
| <sup>1</sup> H NMR of Compound 7o.....  | page 6 |
| <sup>13</sup> C NMR of Compound 7o..... | page 7 |
| <sup>1</sup> H NMR of Compound 7p.....  | page 7 |
| <sup>13</sup> C NMR of Compound 7p..... | page 8 |
| <sup>1</sup> H NMR of Compound 7q.....  | page 8 |
| <sup>13</sup> C NMR of Compound 7q..... | page 9 |
| <sup>1</sup> H NMR of Compound 13b..... | page 9 |

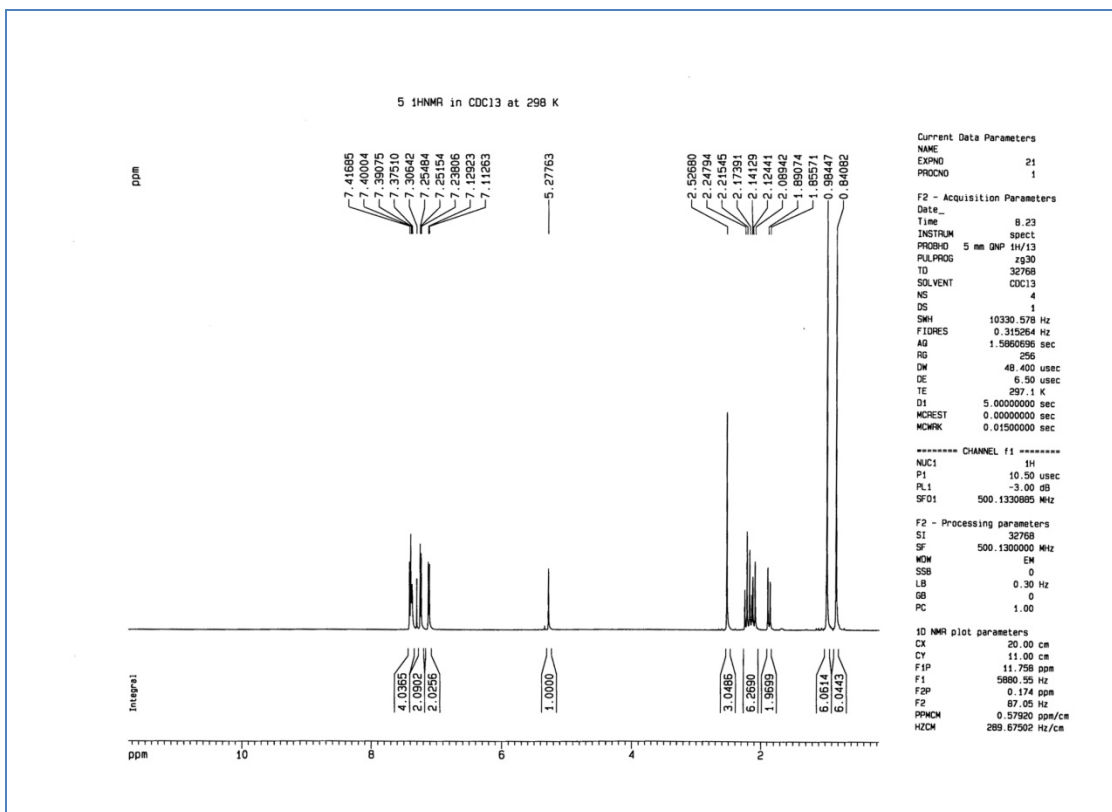

<sup>1</sup>H NMR of Compound 7e

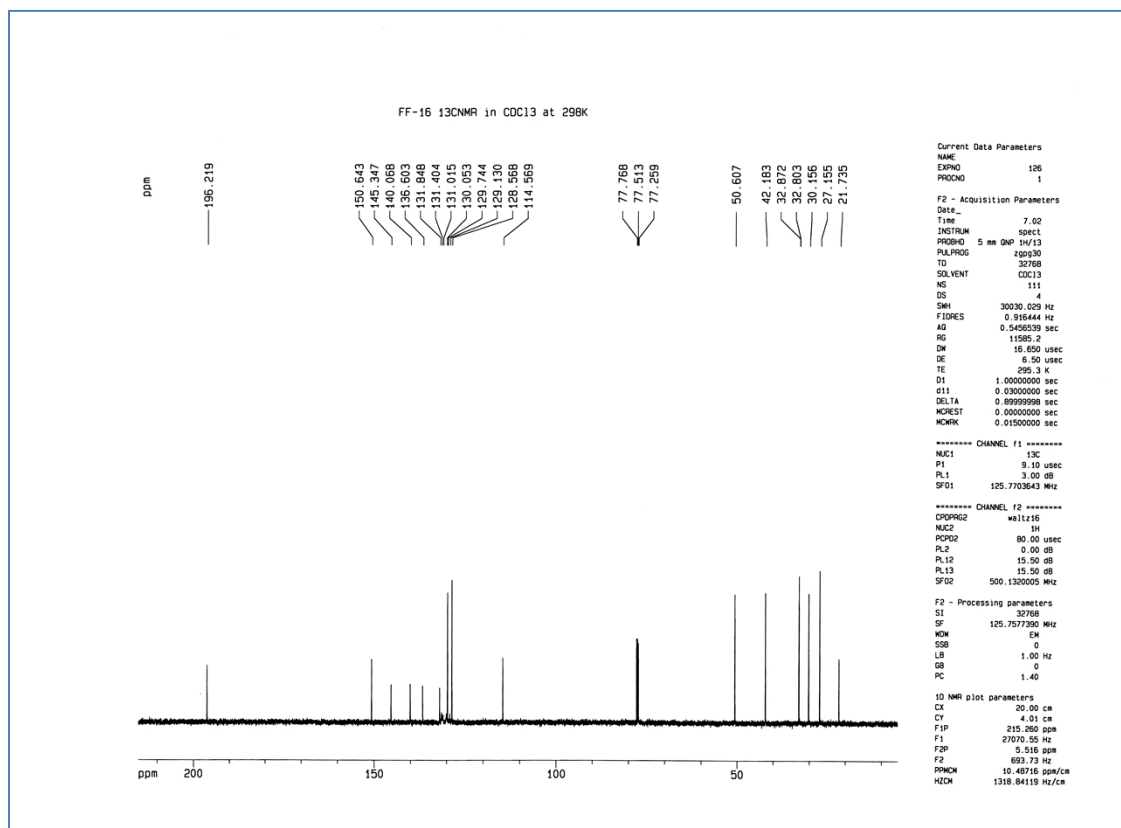

<sup>13</sup>C NMR of Compound 7e

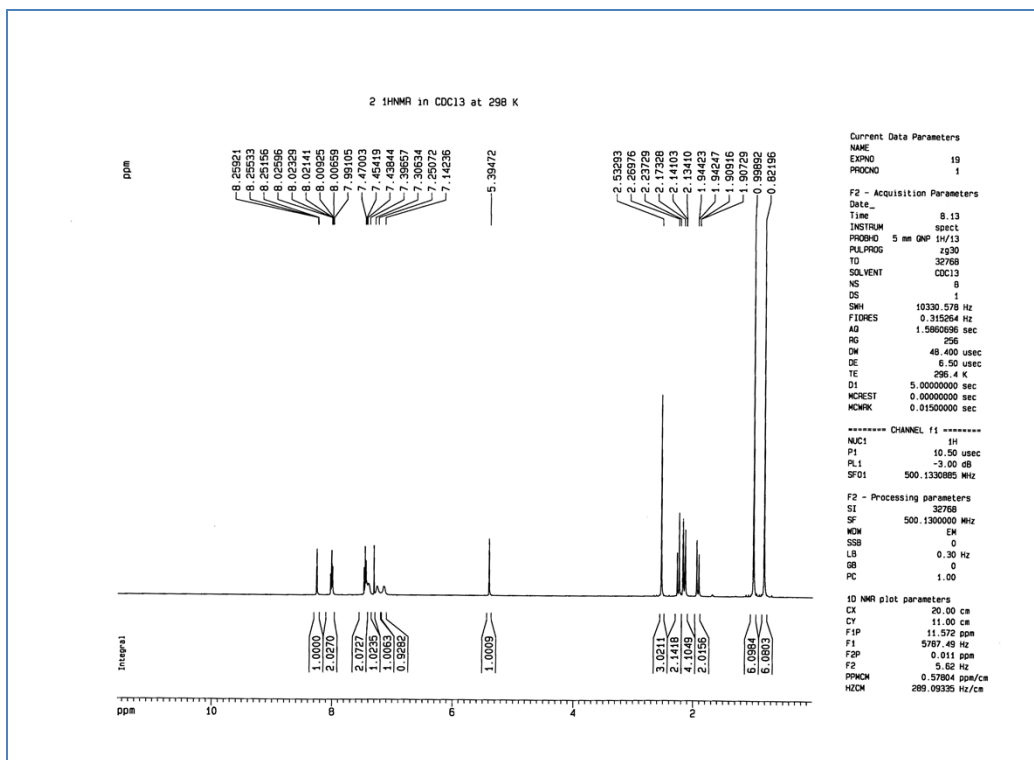

<sup>1</sup>H NMR of Compound 7g

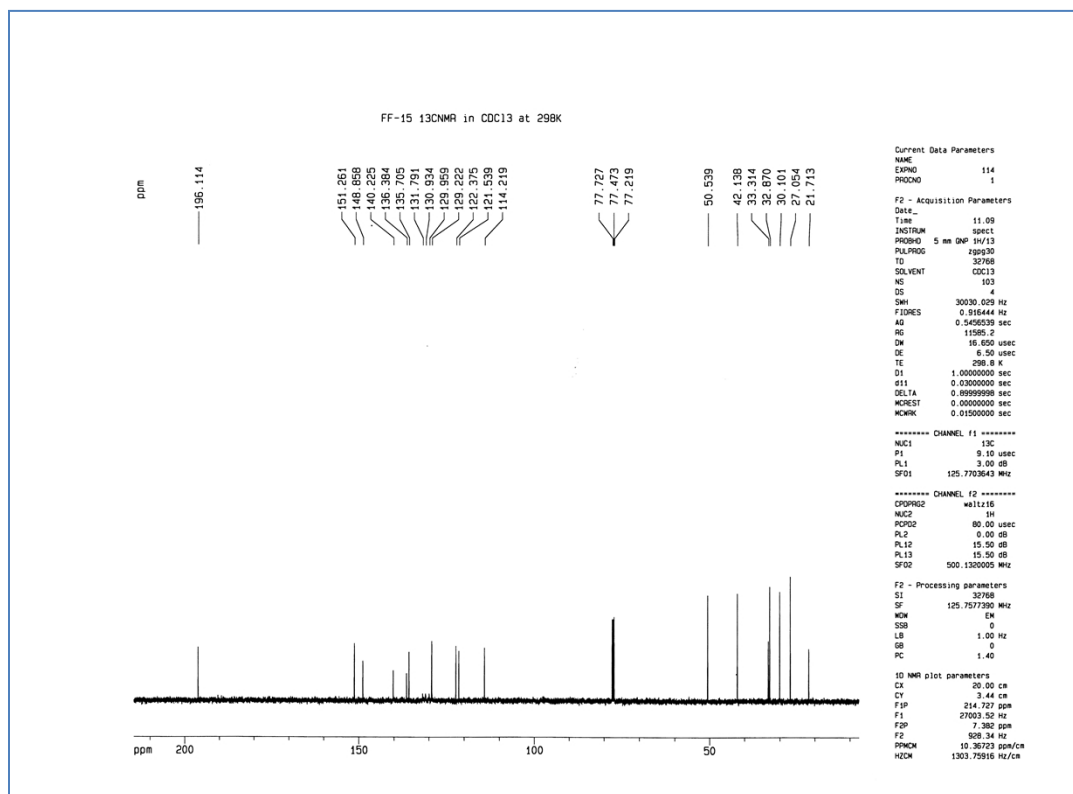

<sup>13</sup>C NMR of Compound 7g

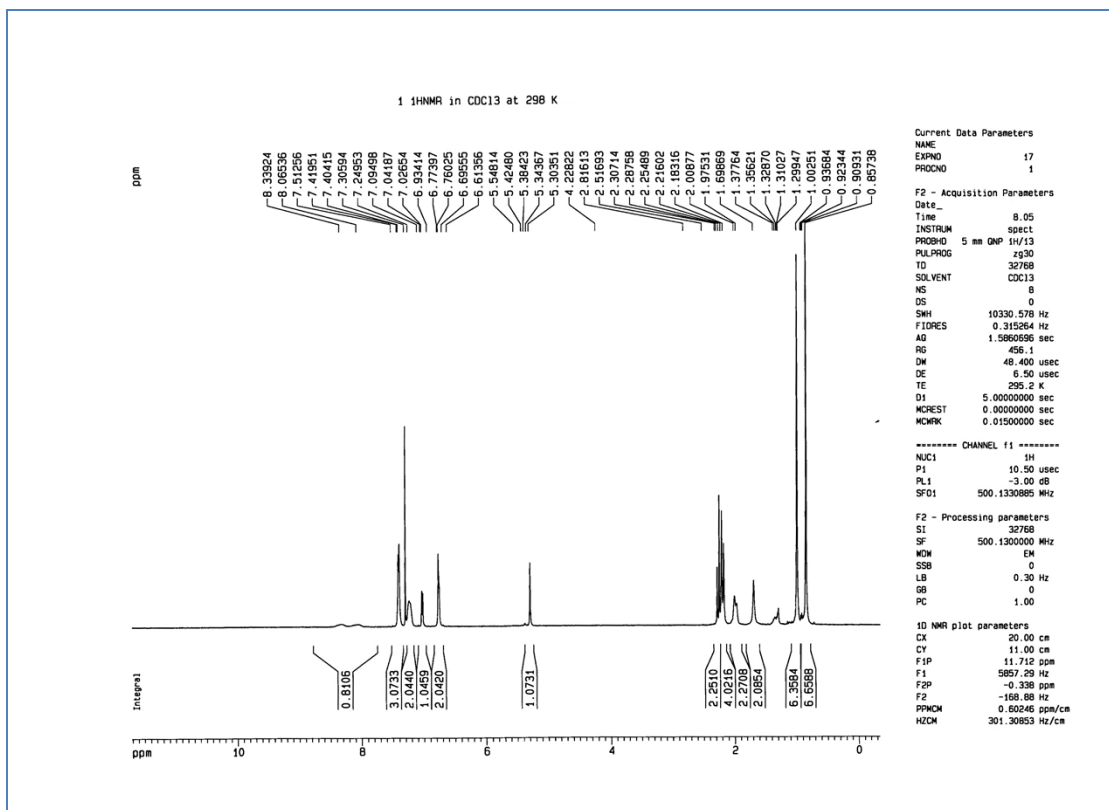

<sup>1</sup>H NMR of Compound 7k

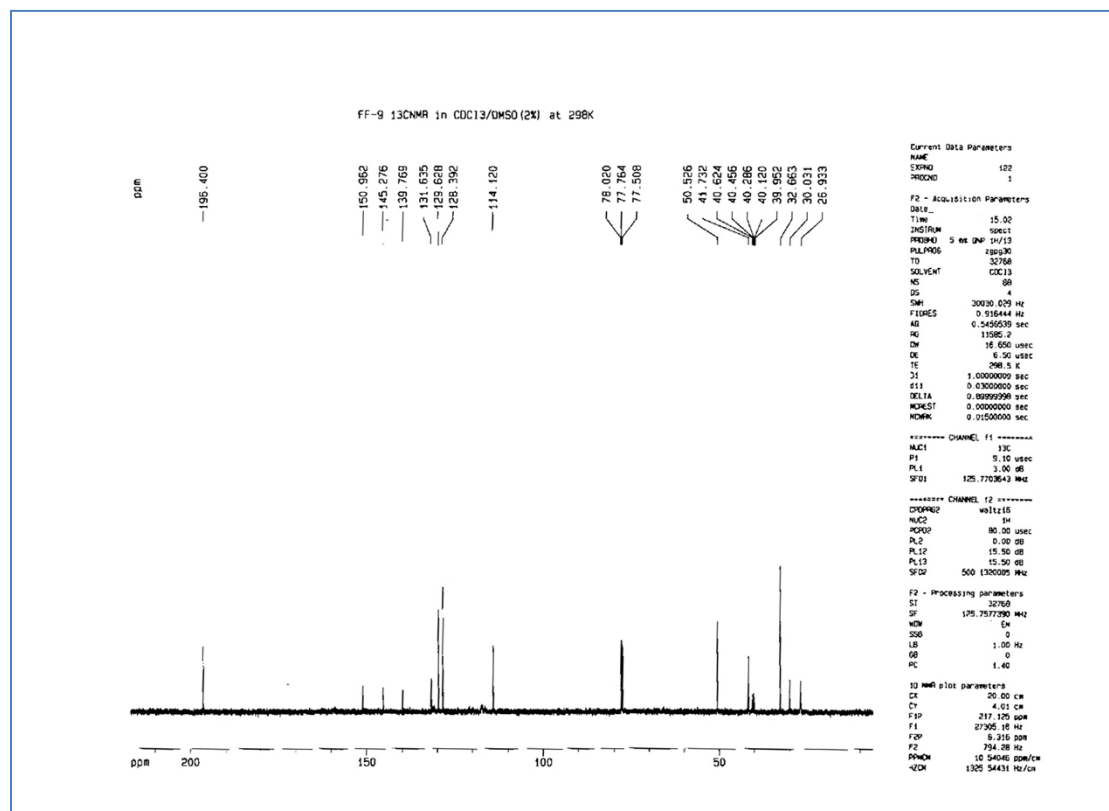

<sup>13</sup>C NMR of Compound 7k

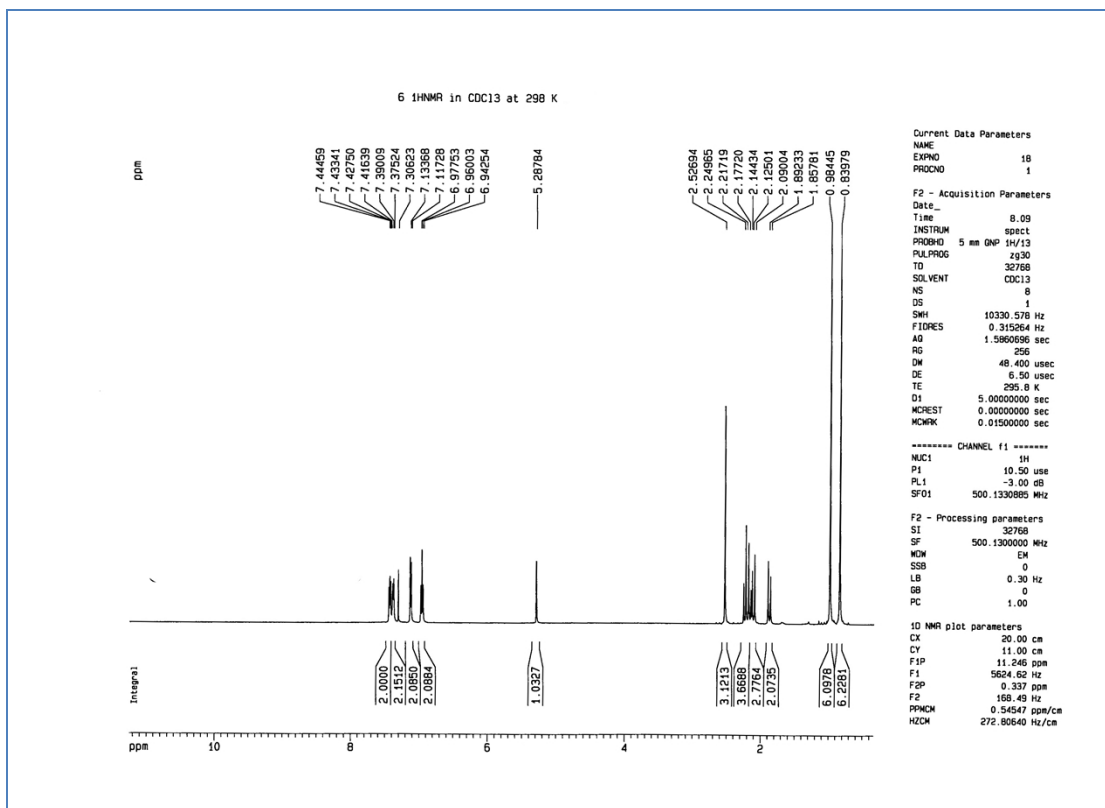

<sup>1</sup>H NMR of Compound 7m

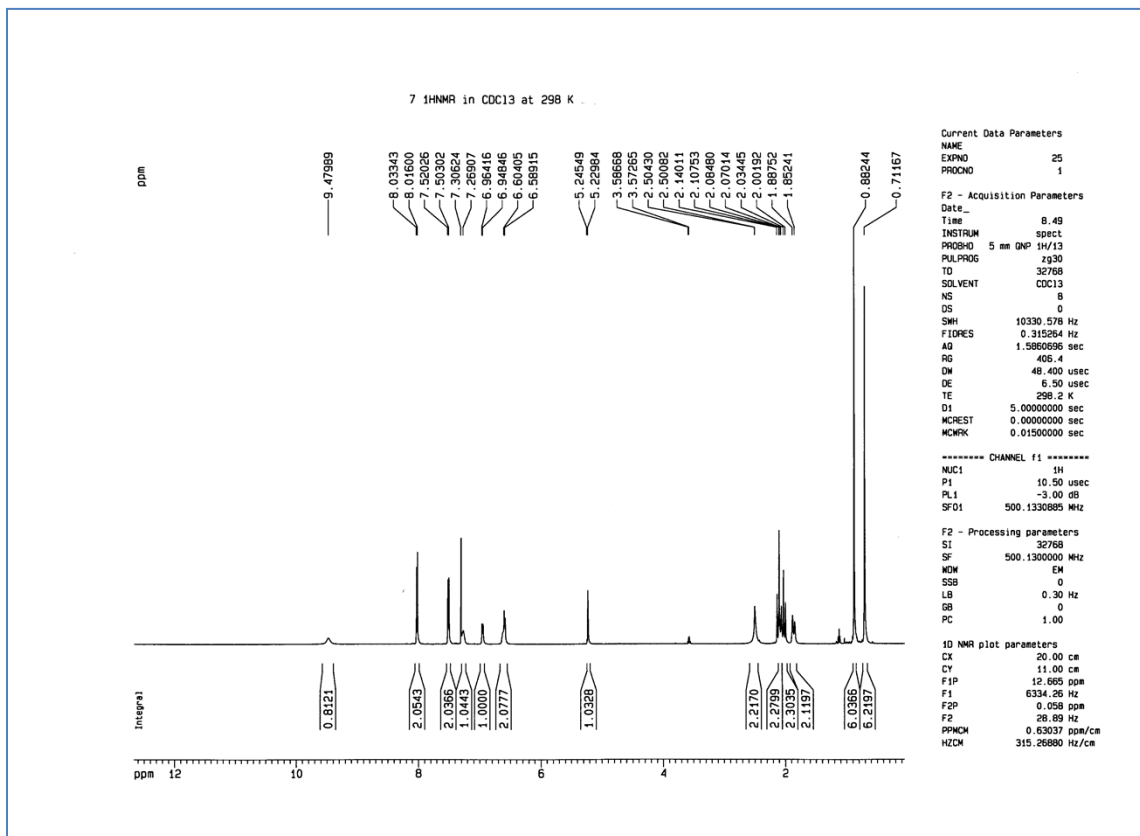

<sup>1</sup>H NMR of Compound 7n

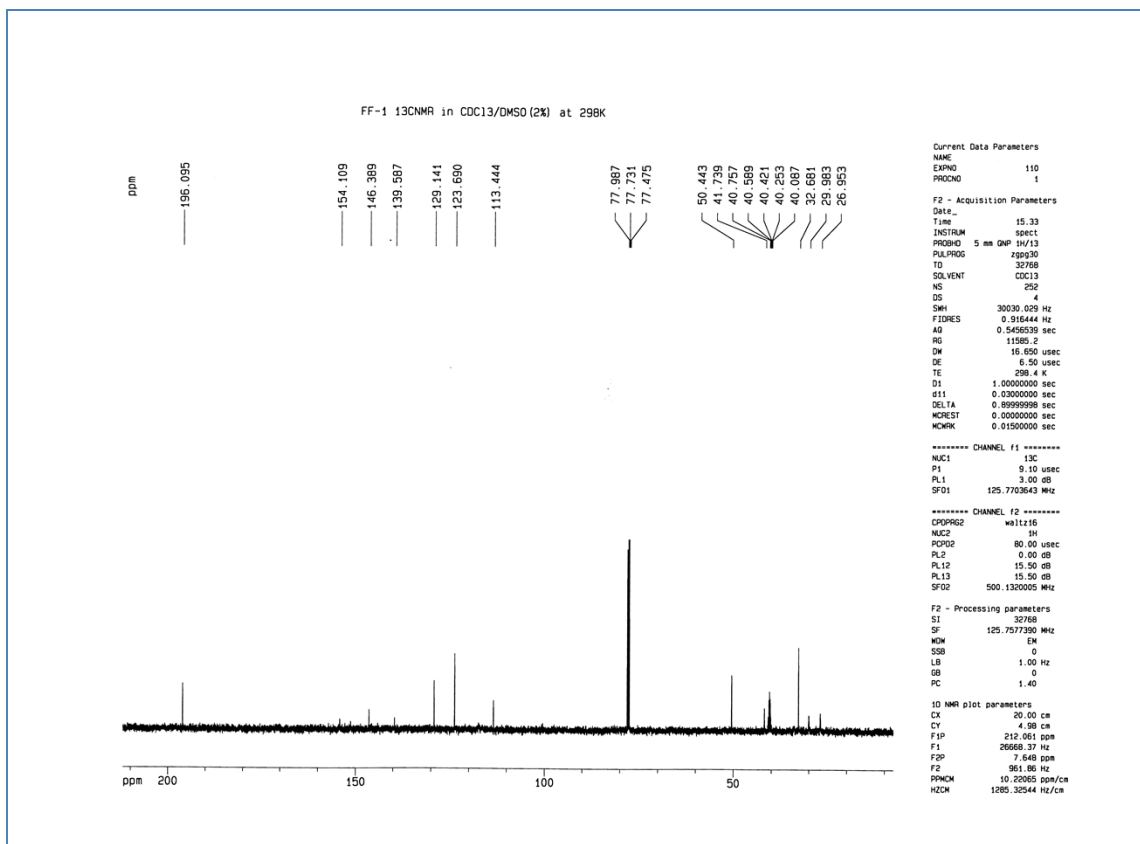

<sup>13</sup>C NMR of Compound 7n

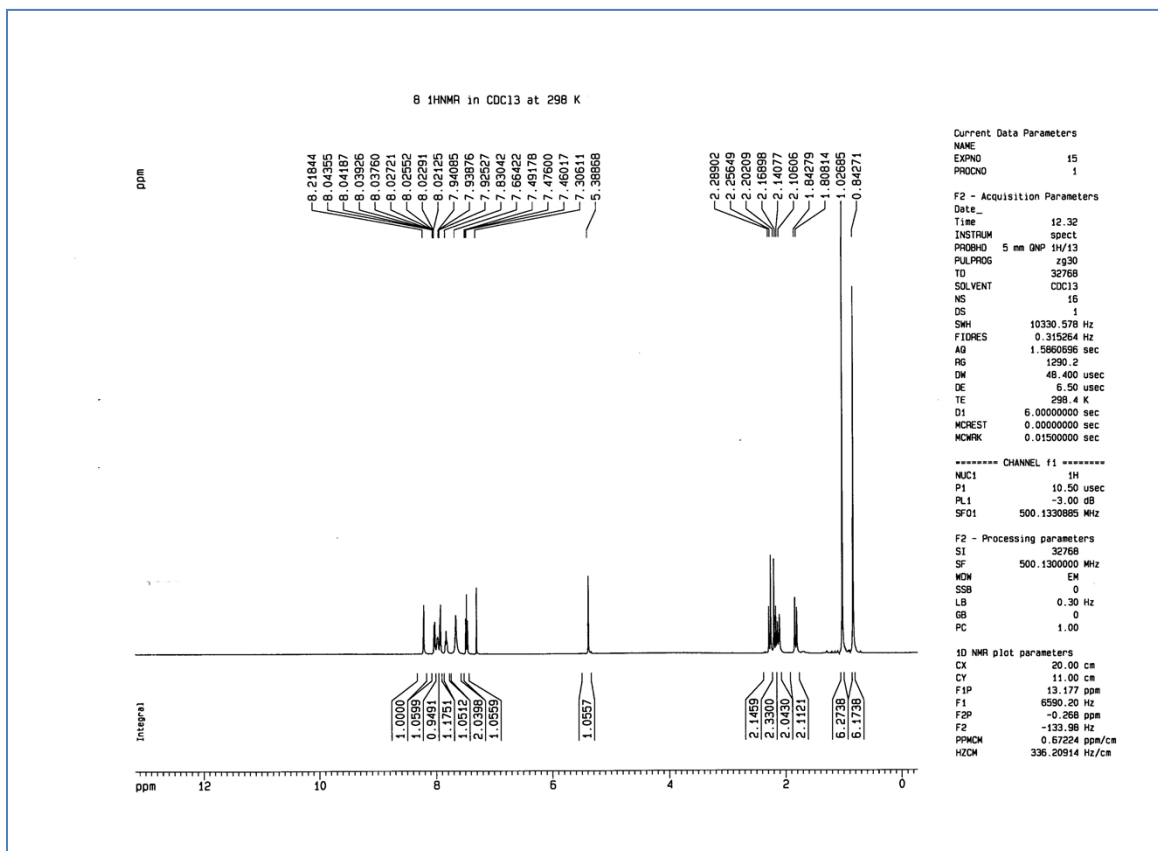

<sup>1</sup>H NMR of Compound 7o

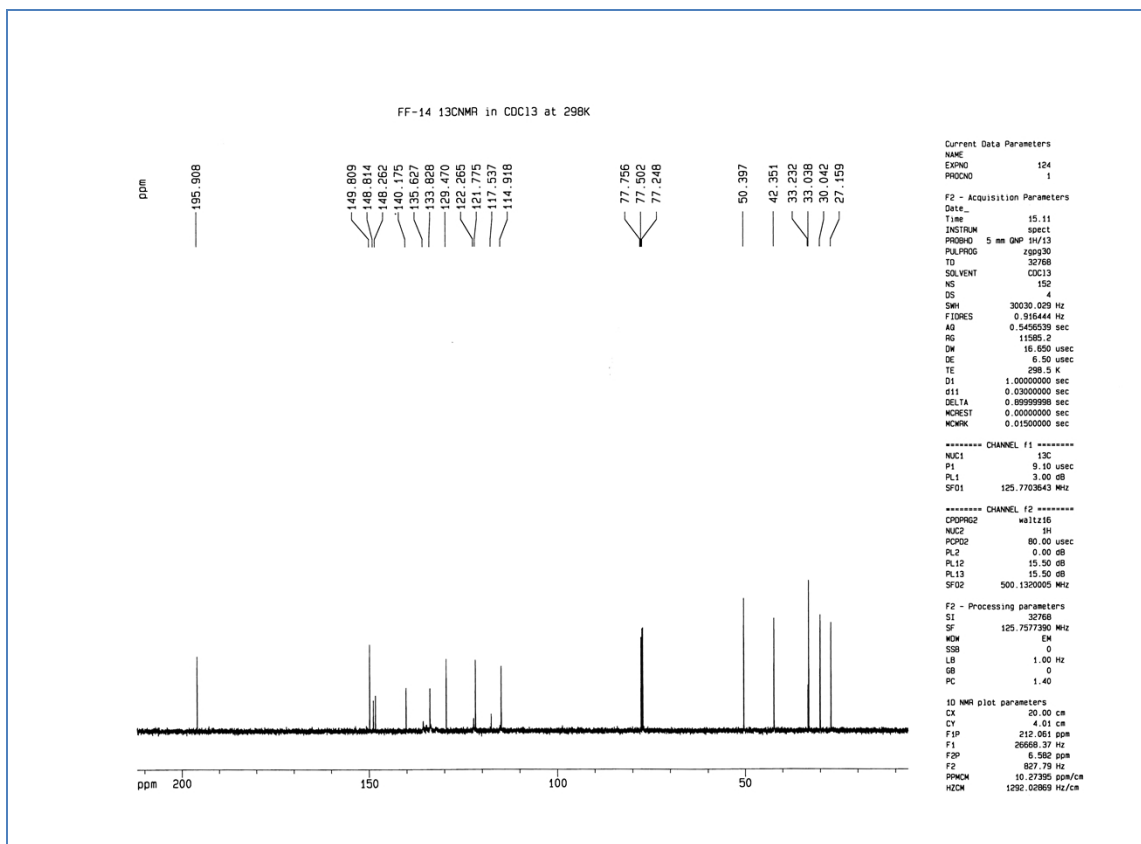

<sup>13</sup>C NMR of Compound 7o

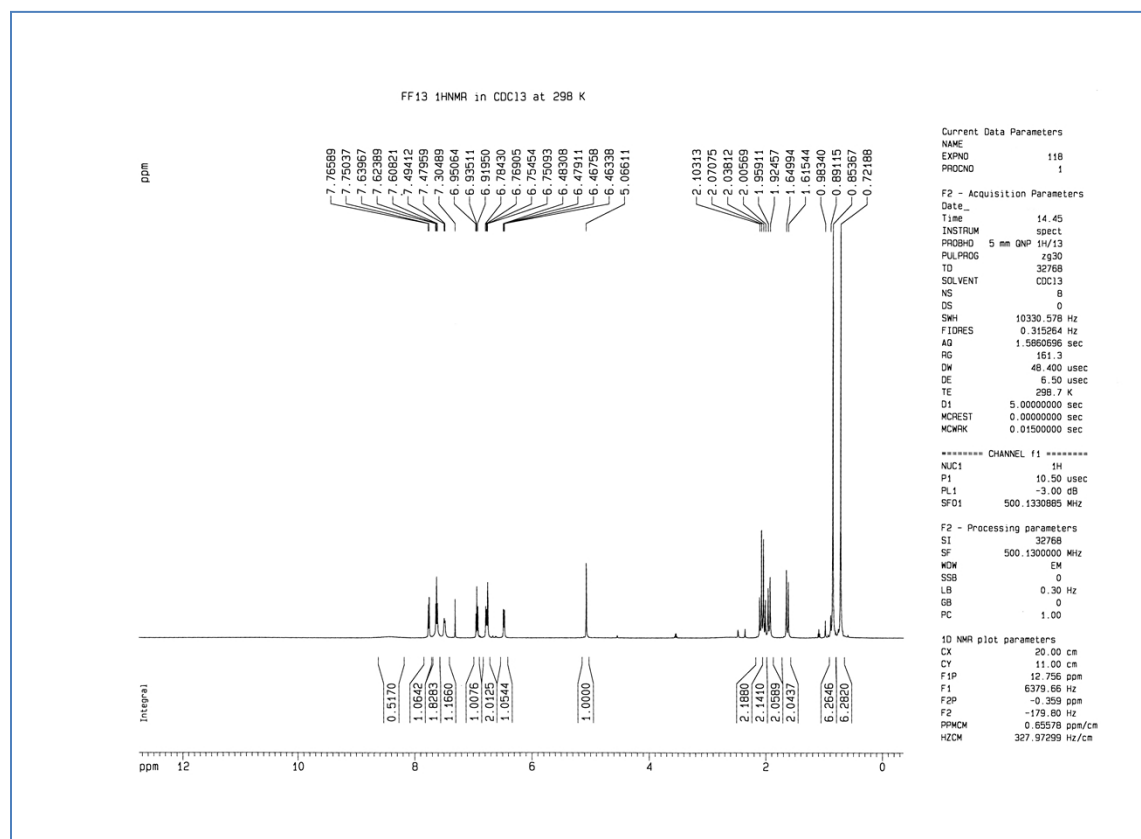

<sup>1</sup>H NMR of Compound 7p

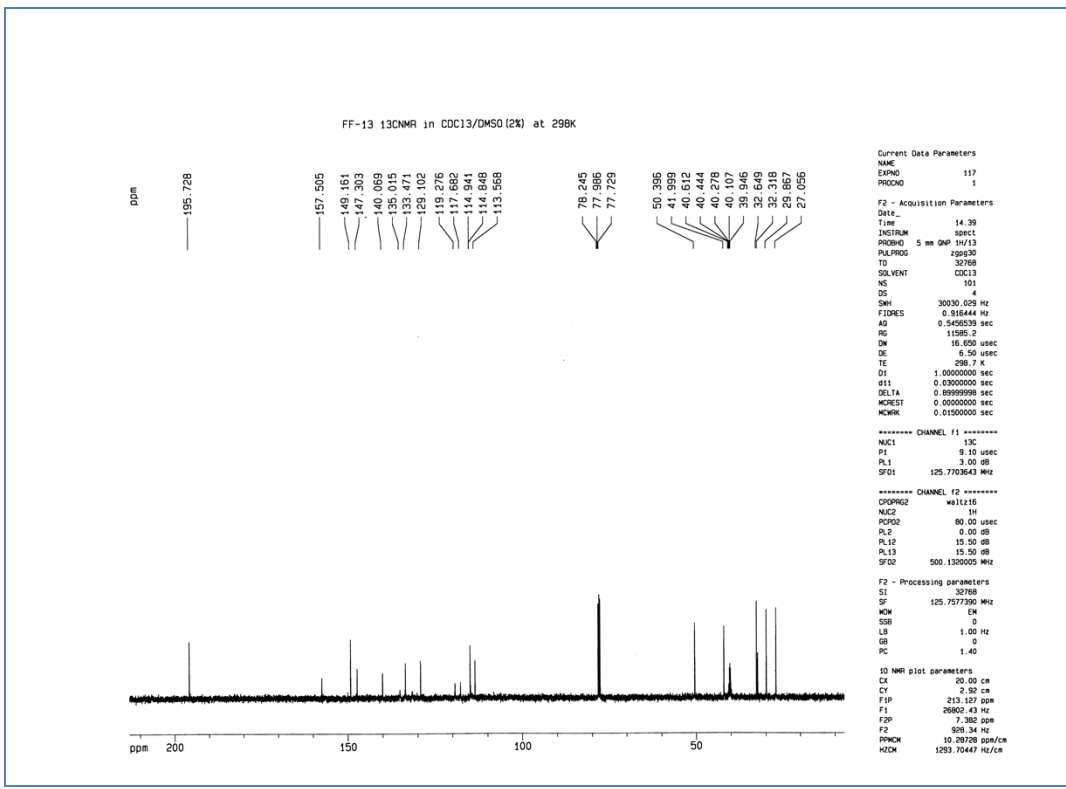

<sup>13</sup>C NMR of Compound 7p

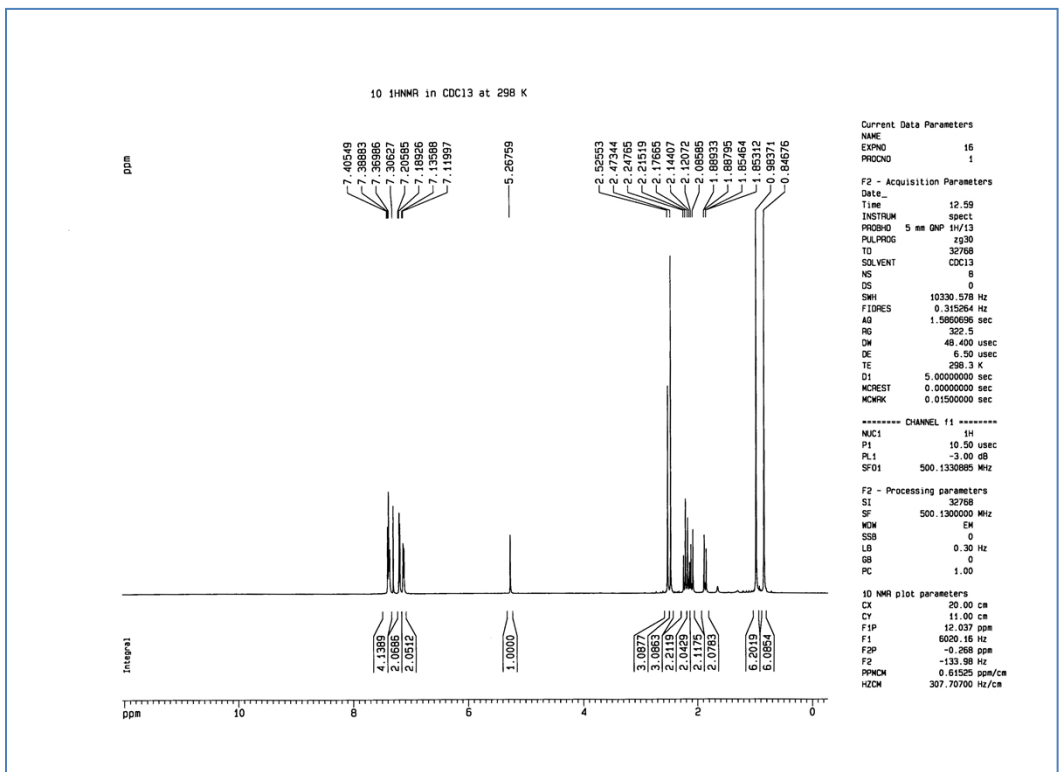

<sup>1</sup>H NMR of Compound 7q



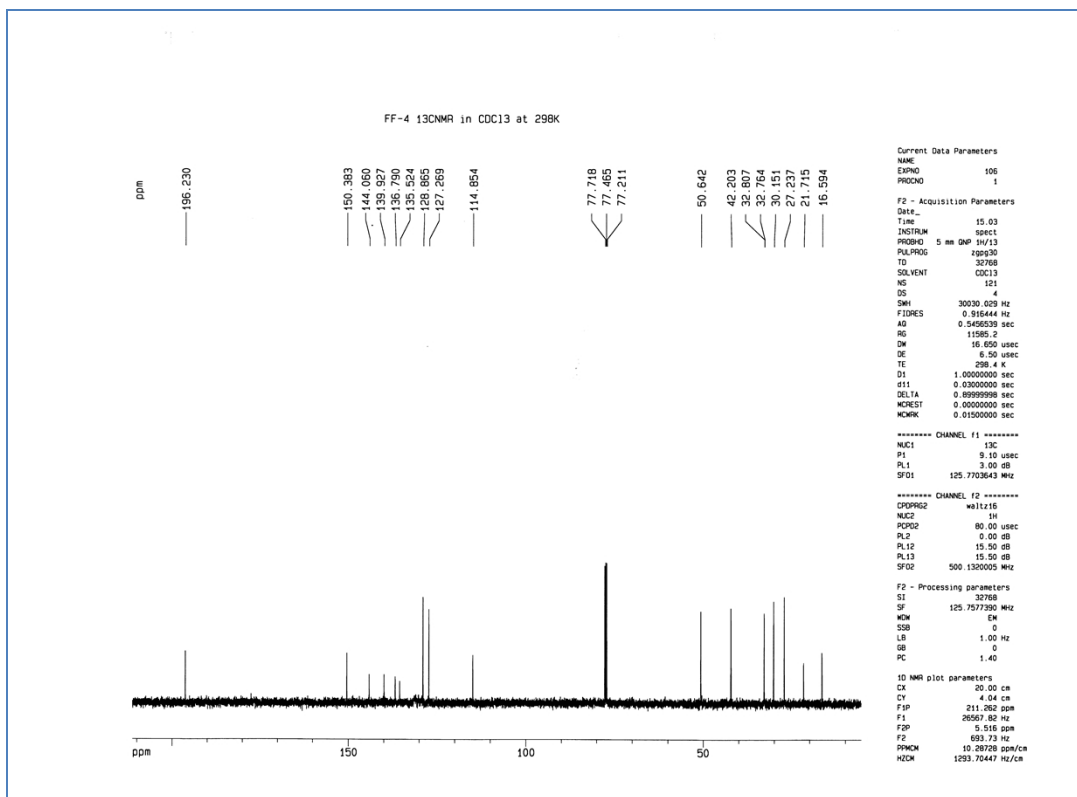

<sup>13</sup>C NMR of Compound 7q

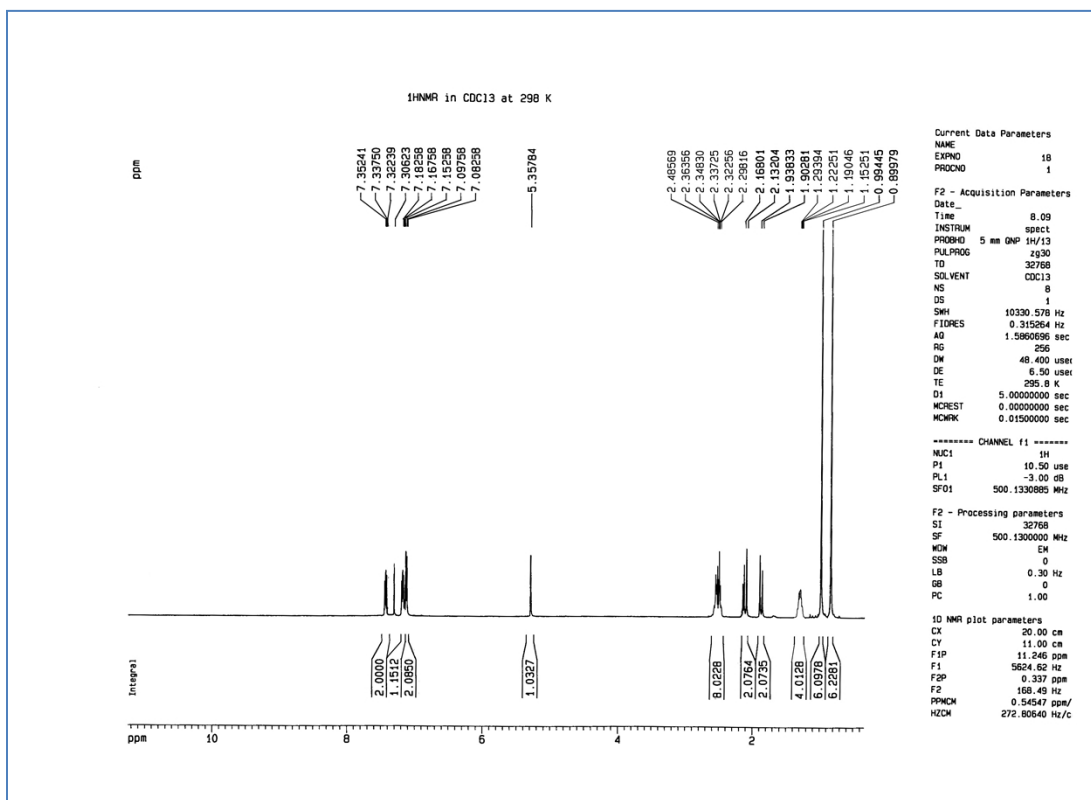

<sup>1</sup>H NMR of Compound 13b
